# Supplementary figures and images for: Different diameters of titanium dioxide nanotubes modulate Saos-2 osteoblast-like cell adhesion and osteogenic differentiation and nanomechanical properties of the surface
Source: Royal Society of Chemistry journal article supplement (doi:10.1039/c9ra00761j), 2019-01-01

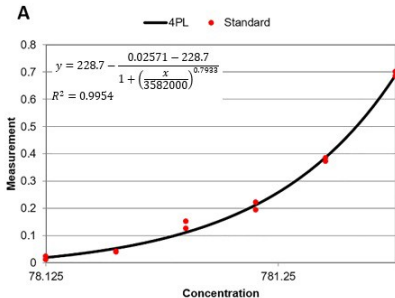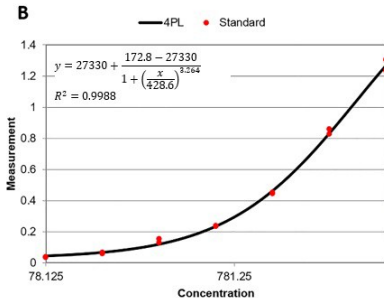

Supplement: c9ra00761j1.pdf [file c9ra00761j1.pdf]
